# Supplementary material for: Genome-Wide Identification and Expression Profile Analysis of the WUSCHEL-Related Homeobox (WOX) Genes in Woodland Strawberry (Fragaria vesca)
Source: MDPI journal article supplement (doi:10.3390/horticulturae8111043), 2022-11-07
Supplement: s1 [file s1]

**Supplementary Table S1:** Primer sequences used in qRT-PCR.

| Gene locus ID  | primer sequence/F    | primer sequence/R     |
|----------------|----------------------|-----------------------|
| FvH4_3g34410.1 | GGTACCGGTTTTCTCCCTCA | CAGATCCATCGTTGCTGTCG  |
| FvH4_3g35730.1 | GGCGGTCTCTCAGTATCCAT | GTCTCCTCTTGACCCCAACA  |
| FvH4_2g34030.1 | ATGAAGGTGCATCAGTTCGC | AGCTTGTTTCTAGGGCCACT  |
| FvH4_5g17270.1 | AGATTCGTCTCTCGTTCCC  | TCTAGTGCCCTCAACTGCTC  |
| FvH4_4g32650.1 | CTGCAGTTCCTTGCGAAAT  | GTTACAGGCGTCTGATCTTC  |
| FvH4_7g24100.1 | TCAGGTCTGGACTTCGAACG | AGGCTCCGAACCTCACTTGAT |
| FvH4_4g32660.1 | ACTTCCAACACGACGCAAAA | CGTCGGTGTCTTTAAGCCAG  |
| FvH4_1g11910.1 | TTAGGTCCCCAAGTGCAGAG | TCCCAACAAGCCCTGATCTT  |
| FvH4_3g04400.1 | ATCCGTTTCCAGCTGAGACA | GGTGCAGAAGAAACCCCTTG  |
| FvH4_5g02150.1 | CGCAAGGGAGAAGTAGCAGT | CCTGGCTCGGTAGTTCTGAA  |
| FvH4_3g08310.1 | AAACGGTTCATGCCACAGAC | CACCGACTTGACCGTACTCT  |
| FvH4_1g10280.1 | CAATGGAGGTGTGGGGTTTG | CAGAATCTGTAGCTGCACCG  |
| FvH4_3g10130.1 | ACAACATCATCAGGGCTGGA | CGATGCTTGTGTTTGGACCT  |
| FvH4_5g03570.1 | CAACTCCGGAAACAGATCGC | CCTCGCAGTTACCTTGTTGC  |
| FvH4_1g29830.1 | CGCCGAAAGAAGAGACTGTG | CGGCTGCTAATTGGTTCCTC  |

|                |                     |                      |
|----------------|---------------------|----------------------|
| FvH4_5g25470.1 | GCAGAGAAGAGTGTGGCAG | CGCCGTACACATTTCCCATC |
|----------------|---------------------|----------------------|

**Supplementary Table S2:** List of *FvWOX* genes

| Gene locus ID  | Rename  |
|----------------|---------|
| FvH4_2g34030.1 | FvWOX4  |
| FvH4_5g17270.1 | FvWOX1  |
| FvH4_3g34410.1 | FvWOX3a |
| FvH4_3g35730.1 | FvWOX2  |
| FvH4_1g11910.1 | FvWUS   |
| FvH4_3g04400.1 | FvWUSb  |
| FvH4_7g24100.1 | FvWOX5  |
| FvH4_5g02150.1 | FvWOX3b |
| FvH4_4g32650.1 | FvWOX2a |
| FvH4_4g32660.1 | FvWOX3c |
| FvH4_3g08310.1 | FvWOX9  |
| FvH4_3g10130.1 | FvWOX9a |
| FvH4_1g29830.1 | FvWOX11 |

|                |         |
|----------------|---------|
| FvH4_1g10280.1 | FvWOX8  |
| FvH4_5g03570.1 | FvWOX8a |
| FvH4_5g25470.1 | FvWOX8b |

**Supplementary Table S3:** The amino acid sequences of 8 conserved motifs

|         |                                                      |
|---------|------------------------------------------------------|
| Motif 1 | ILEEJYN SGMRTPSAZQIQQIT AQLRQYGKIEGKNVFYWFQNHKARERQK |
| Motif 2 | RSRWTPTPEQJ                                          |
| Motif 3 | CVMTDDQVEQLRKQIAVYAVICEQLVDMHKAFTAQQDLA GKMKGNVYGD   |
| Motif 4 | EEESRETZTLELFPLKSEN L                                |
| Motif 5 | DVAFEVAEGPFNVREAFGDDAVLIHSSGHPVLTNEWGVT LHS LHHGAFYY |
| Motif 6 | RRRQLMSMYQSDSKQQQTLNNTV SGLQDKESAGGLTN               |
| Motif 7 | ATLIYPKLLDFHHYYDYDYGMV                               |
| Motif 8 | KKFTADGHVPMQRSGLVGN G NCTNWKPEDQYMN MNNKYSNI         |

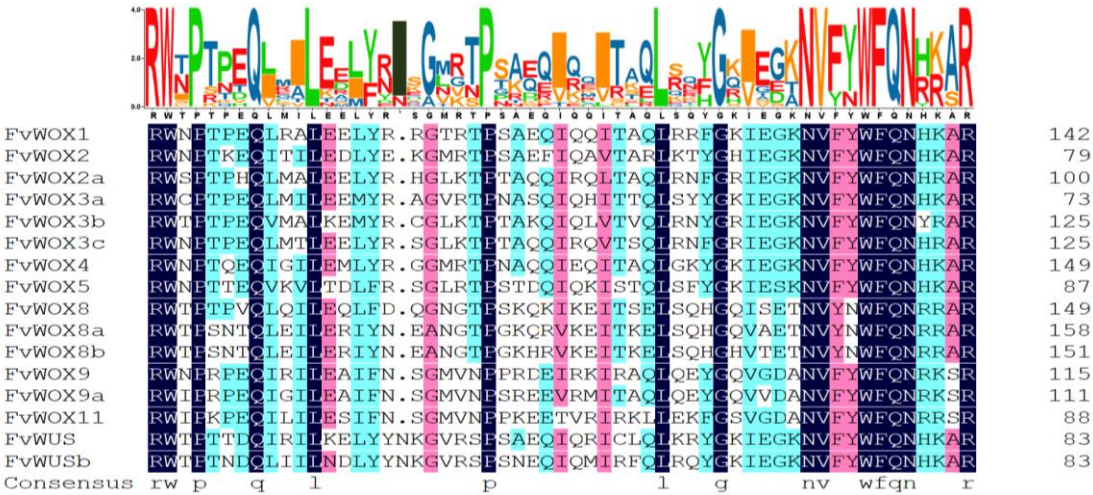

**Supplementary Figure S1.** Sequence alignments of the HB domains of FvWOXs. Sequence logos about the homeobox (HB) domain were shown on the top.



**Supplementary Figure S3.** The interaction network prediction of FvWOX3a with other proteins. The relationship between proteins is shown in the legend in the figure.
